# Supplementary material
Source: PubMed Central journal article supplement (PMC4935590)
Supplement: NIHMS793074-supplement-sup1.pdf [file NIHMS793074-supplement-sup1.pdf]

## **Supplementary Material for:**

### **Combined targeting of TGF-beta, EGFR and HER2 suppresses lymphangiogenesis and metastasis in a pancreatic cancer model**

Jesse Gore, Imade E. Imasuen-Williams, Abass M. Conteh, Kelly E. Craven,

Monica Cheng and Murray Korc

#### **List of materials:**

1. Supplementary Figure Legends.
2. Supplementary Table 1. Lymphangiogenic factors that are up-regulated in KRC cells.
3. Supplementary Fig. 1. Lymphangiogenic genes are up-regulated in KRC and KIC tumors.
4. Supplementary Fig. 2. TGF- $\beta$  enhances lymphangiogenic gene expression.
5. Supplementary Fig. 3. Lymphangiogenic factors are elevated in human pancreatic cancer cells.
5. Supplementary Table 2. Lymph node involvement in angiogenic human PDACs.

## Supplementary Figure Legends

### Supplementary Fig. 1. Lymphangiogenic genes are up-regulated in KRC and KIC tumors.

(A-B) qPCR for the indicated mRNAs shows that LEC markers (A, *Lyve-1* and *Pdgn*) and lymphangiogenic genes (B, *Nrp1*, *Vegfc*, *Vegfd*, *Vegfr3*) are significantly increased in KRC (open bars) and KIC tumors (hatched bars) compared with control (C) pancreata (closed bars). Data are mean  $\pm$  SEM from 5 mice per group. \*, P<0.05; \*\*, P<0.01.

### Supplementary Fig. 2. TGF- $\beta$ enhances lymphangiogenic gene expression.

(A) qPCR shows that *Pdgfa*, *Vegfc* and *Vegfd* mRNA levels are significantly increased in KRC cells (open bars) compared with KC cells (closed bars), whereas none of these mRNAs are up-regulated in KSC cells (gray bars). (B) LYVE-1-positive LECs are not detectable in the stroma surrounding PanIN (left) or PCCs (middle) in KSC pancreata, and quantification (right) shows the marked decrease in LYVE-1 intensity compared with normal (C) pancreata. Scale bars, 50  $\mu$ m. (C) qPCR shows that TGF- $\beta$ 1 (open bars, [0.5 nM]) does not up-regulate *Pdgfa*, *Vegfc* or *Vegfd* in KSC cells (left), whereas all three mRNAs are induced by TGF- $\beta$ 1 in KRC cells (right). Data in (A, C) are mean  $\pm$  SEM of three independent experiments using two cell lines per GEMM. \*, P<0.05; \*\*, P<0.01.

**Supplementary Fig. 3. Lymphangiogenic factors are elevated in human pancreatic cancer cells.** A heatmap shows the expression levels of the indicated mRNAs in *KRAS*-mutated human pancreatic cell lines. Normalized robust multi-array average (RMA) values from the Cancer Cell Line Encyclopedia were used to generate the heatmap. Red = upregulated; blue = down-regulated.

**Supplementary Table 1:** Lymphangiogenic factors that are up-regulated in KRC cells.

| <b>Number</b> | <b>Symbol</b> | <b>Fold Change</b> | <b>P-value</b> | <b>FDR</b> |
|---------------|---------------|--------------------|----------------|------------|
| 1             | <i>Ccbe1</i>  | 30.36              | 7.67E-07       | 7.57E-05   |
| 2             | <i>Cxcl12</i> | 10.99              | 1.47E-07       | 4.61E-05   |
| 3             | <i>Pdgfa</i>  | 4.64               | 2.80E-06       | 1.25E-04   |
| 4             | <i>Vegfc</i>  | 4.54               | 1.58E-06       | 9.57E-05   |
| 5             | <i>Pdgfb</i>  | 3.92               | 3.96E-05       | 5.22E-04   |
| 6             | <i>Edn1</i>   | 3.08               | 1.34E-04       | 1.15E-03   |

Genes are ranked by fold change (FC), *P*-value and false discovery rate (FDR). A FC>1.5, *P*<0.01 and FDR<0.05 was considered statistically significant.

Supplementary Fig. 1

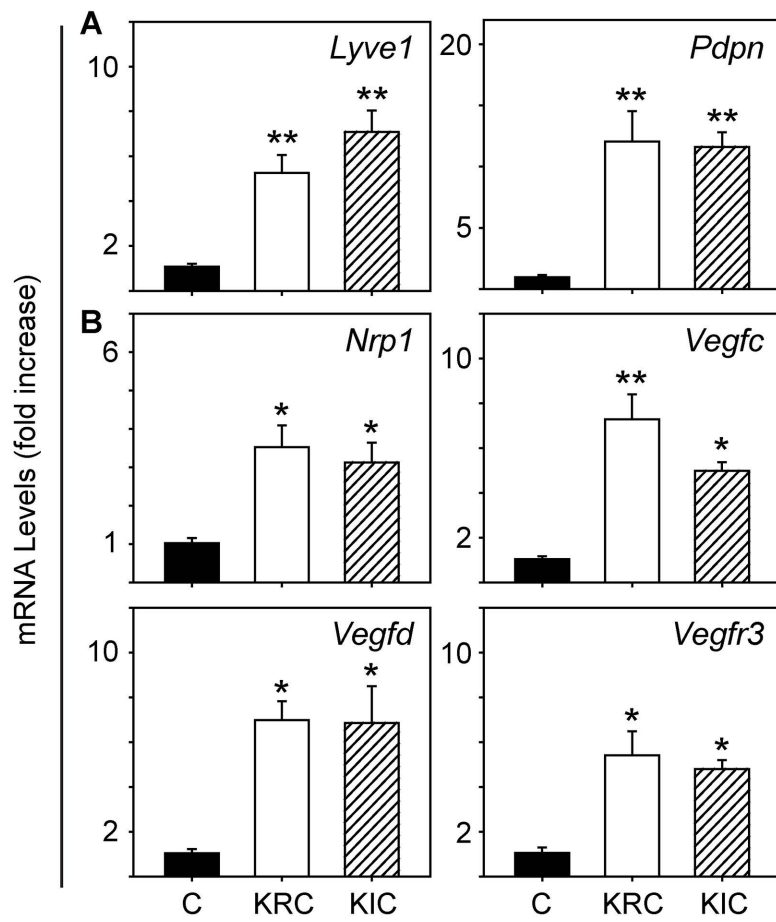

Supplementary Fig. 2

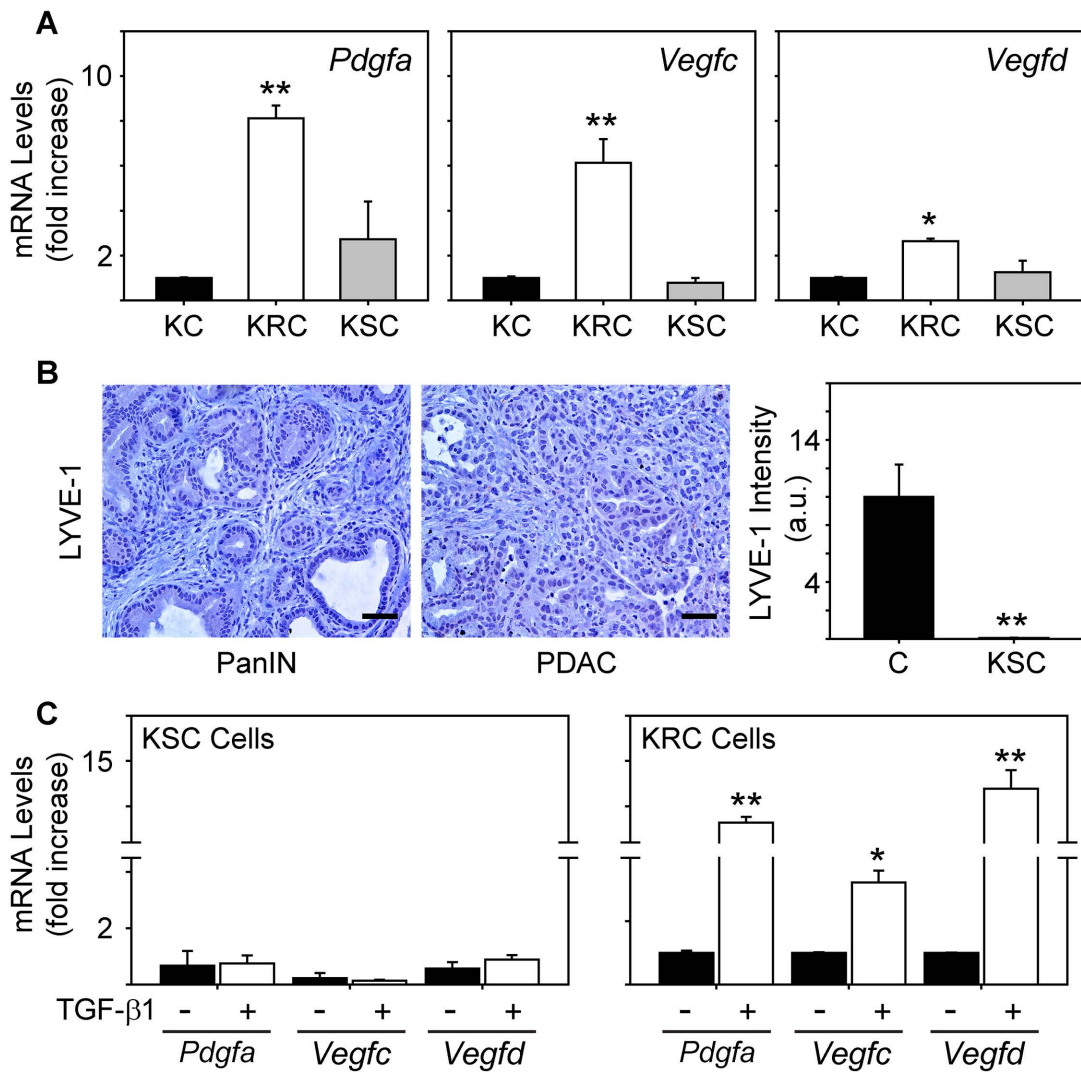



**Supplementary Table 2:** Lymph node involvement in angiogenic human PDACs.

|                       | <b>Angiogenic PDACs</b> | <b>Non-angiogenic PDACs</b> |
|-----------------------|-------------------------|-----------------------------|
| Number of patients    | 37                      | 37                          |
| Lymph Node positivity | 83.8% (31/37)           | 73.0% (27/37)               |
| Lymph Node Ratio      | 0.26                    | 0.19                        |

Analysis of TCGA clinical data revealed that 37 patients in each angiogenic PDAC group had  $\geq 12$  lymph nodes examined for the presence of cancer cells. 31 patients in the angiogenic group had  $\geq 1$  positive node with an overall positive node ratio of 0.26, whereas only 27 patients in the non-angiogenic group had  $\geq 1$  positive and in this group, the node ratio was lower.
